# Supplementary material for: An ionic liquid immobilized copper complex for catalytic epoxidation
Source: Royal Society of Chemistry journal article supplement (doi:10.1039/c5ra12175b), 2015-01-01
Supplement: c5ra12175b1.pdf [file c5ra12175b1.pdf]

## Supporting Information

An Ionic Liquid immobilized Copper complex for catalytic epoxidation

**Including:**

- 1. Experimental procedure for the preparation of catalysts**
- 2. Characterization data for the complexes**
- 3. Catalytic procedure**
- 4.  $^1\text{H}$  NMR and  $^{13}\text{C}$  NMR Spectra of few epoxides**
- 5. Characterization data for terpene epoxides**
- 6. References**

## 1. Experimental procedure for the preparation of catalysts

To a solution of  $[\text{CuCl}_2(\text{PPh}_3)_2]$  (0.2 mmol) in alcohol (20 mL) the corresponding Schiff base ligand (0.2 mmol) was added. The mixture was refluxed for 3 h. The solvent was evaporated to 1/3rd and n-hexane was added to separate the solid complex. The complex was filtered, washed with ethanol and then with hexane and dried in *vacuo*. The formation of complex was checked by TLC (*Inorganic Chemistry Communications*, 14 (2011) 690–693).

## 2. Characterization data for the catalysts

**Table 1** Infrared spectral data ( $\text{cm}^{-1}$ ) for Cu(II) complexes

| Compound | $\nu_{(\text{C}=\text{N})}$ | $\nu_{(\text{C}-\text{O})}$ | $\nu_{(\text{Ni}-\text{O})}$ | $\nu_{(\text{Ni}-\text{N})}$ | Bands due to $\text{PPh}_3$ |
|----------|-----------------------------|-----------------------------|------------------------------|------------------------------|-----------------------------|
| <b>1</b> | 1589                        | 1370                        | 528                          | 457                          | 1433, 1095, 691             |
| <b>2</b> | 1594                        | 1384                        | 532                          | 455                          | 1435, 1096, 693             |
| <b>3</b> | 1588                        | 1356                        | 527                          | 455                          | 1434, 1093, 695             |
| <b>4</b> | 1579                        | 1364                        | 529                          | 459                          | 1437, 1098, 694             |
| <b>5</b> | 1575                        | 1371                        | 529                          | 456                          | 1435, 1097, 695             |

**Table 2** Analytical and Electronic spectral data of the copper complexes

| Complex  | Melting point (°C) | % Found (calculated) |            |            | UV-Vis Spectral Data ( $\lambda_{\max}$ (nm)) |                      |
|----------|--------------------|----------------------|------------|------------|-----------------------------------------------|----------------------|
|          |                    | C                    | H          | N          | d-d bands                                     | Intraligand and C.T. |
| <b>1</b> | 289                | 62.77(62.83)         | 4.32(4.39) | 7.18(7.33) | 12478,16949, 22727                            | 30303,41666, 46511   |
| <b>2</b> | 287                | 59.08(59.27)         | 3.86(3.98) | 6.75(6.91) | 12405,16915, 22752                            | 30298,41605, 46498   |
| <b>3</b> | 286                | 55.15(55.23)         | 3.65(3.71) | 6.32(6.44) | 12450,16901, 22767                            | 30259,41701, 46551   |
| <b>4</b> | 288                | 58.16(58.26)         | 3.82(3.91) | 9.01(9.06) | 12510,16925, 22776                            | 30321,41640, 46598   |
| <b>5</b> | 291                | 61.59(61.69)         | 4.45(4.51) | 6.66(6.96) | 12498,17001, 22699                            | 30309,41629, 46548   |

**Table 3** ESR spectral data of the Cu<sup>II</sup> complexes

| Complex  | $g_{\parallel}$ | $g_{\perp}$ | $A_{\parallel}$<br>x 10 <sup>-4</sup> cm <sup>-1</sup> | $A_{\perp}$<br>x 10 <sup>-4</sup> cm <sup>-1</sup> | $\alpha^2$ | $\beta^2$ |
|----------|-----------------|-------------|--------------------------------------------------------|----------------------------------------------------|------------|-----------|
| <b>1</b> | 2.269           | 2.064       | 158.00                                                 | 16.8                                               | 0.75       | 0.69      |
| <b>2</b> | 2.164           | 2.048       | 134.00                                                 | 18.2                                               | 0.87       | 0.86      |
| <b>3</b> | 2.202           | 2.044       | 146.00                                                 | 20.4                                               | 0.66       | 0.71      |
| <b>4</b> | 2.215           | 2.066       | 152.20                                                 | 22.8                                               | 0.73       | 0.64      |
| <b>5</b> | 2.226           | 2.046       | 144.00                                                 | 23.6                                               | 0.79       | 0.61      |

### 3. Catalytic procedure

In a typical reaction, the catalyst (8 mmol) was dissolved in 2 mL of 1:1 mixture of Ethyl-Methyl-Imidazolium (EMIM) ionic liquid and dichloromethane. Substrate (1 mmol) was added and followed by addition of phosphoric acid (4 mmol). The pH was adjusted to near

neutral condition using aqueous solution of sodium hydroxide and the solution was stirred for about 2-3 minutes. This was followed by the addition of hydrogen peroxide (30% in water) (2.6 equiv). The reaction mixture was stirred at room temperature for about 3 hours (25°C and 12 hours for terpenes). The completion of the reaction was monitored by GC.

The reusability of the catalysts was also examined. After completion of the reaction, the reaction mixture was extracted with diethyl ether (3 X 3 cm<sup>3</sup>). The ether layer was collected and then a definite amount of toluene was added as an internal standard for GC analysis. The ionic liquid phase including the catalyst was washed with diethyl ether and then dried in vacuum at room temperature. Seven recycling experiments were performed.

#### *Product analysis*

The reaction product analysis was carried out using GC (Shimadzu 2014) equipped with a 5% diphenyl and 95% dimethyl siloxane Restek capillary column (30 m length and 0.25 mm diameter) and a flame ionization detector (FID). The initial column temperature was increased from 60°C to 150°C at the rate of 10°C/min and then to 220°C at the rate of 40°/min. Nitrogen gas was used as a carrier gas. The temperatures of the injection port and FID were kept constant at 150°C and 250°C respectively during product analysis. Dodecane was used as an internal standard. The retention times for different compounds were determined by injecting pure compounds under identical conditions.

#### 4. $^1\text{H}$ NMR and $^{13}\text{C}$ NMR Spectra of few epoxides

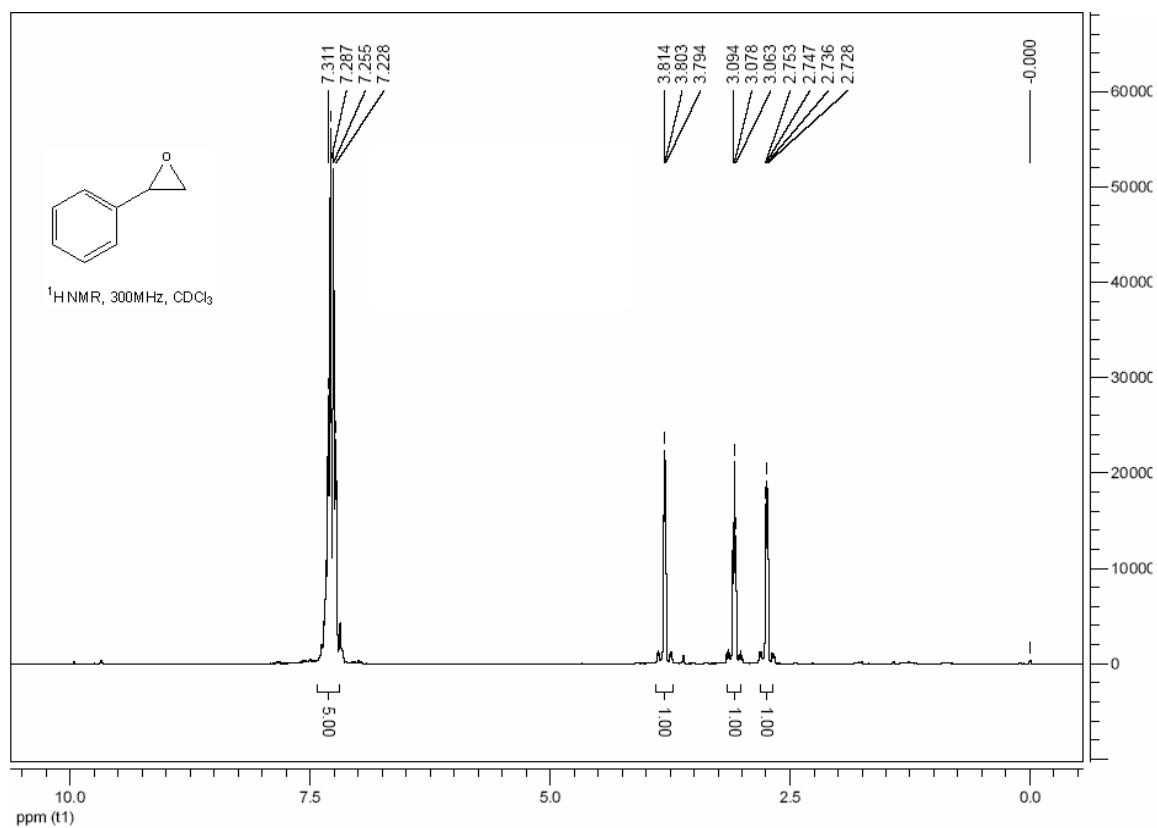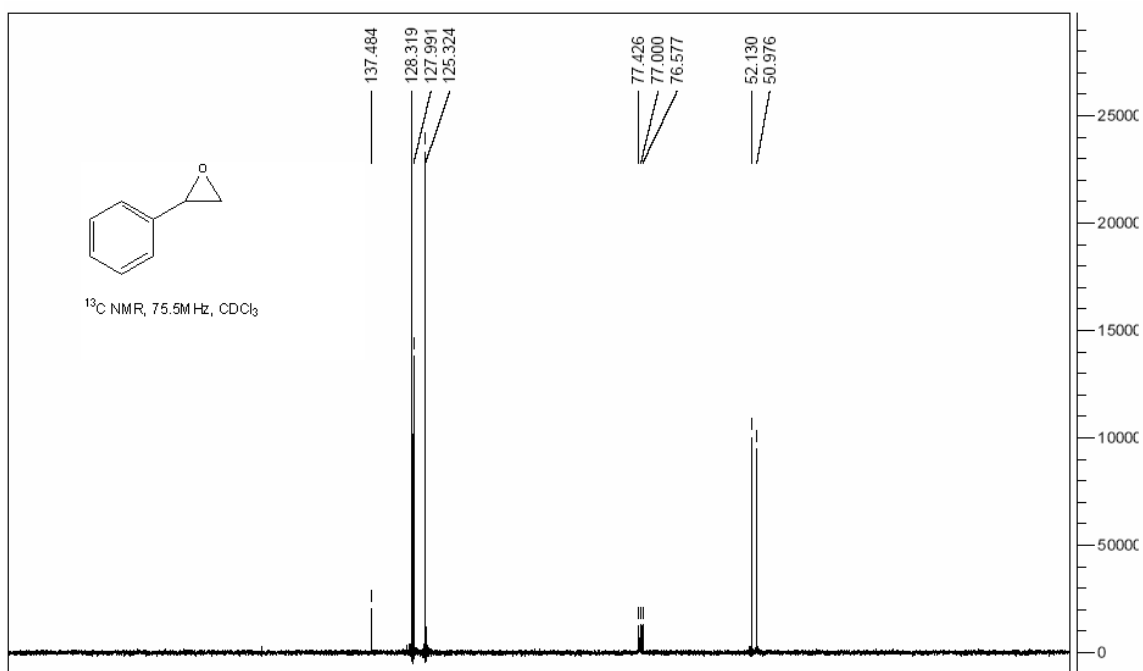

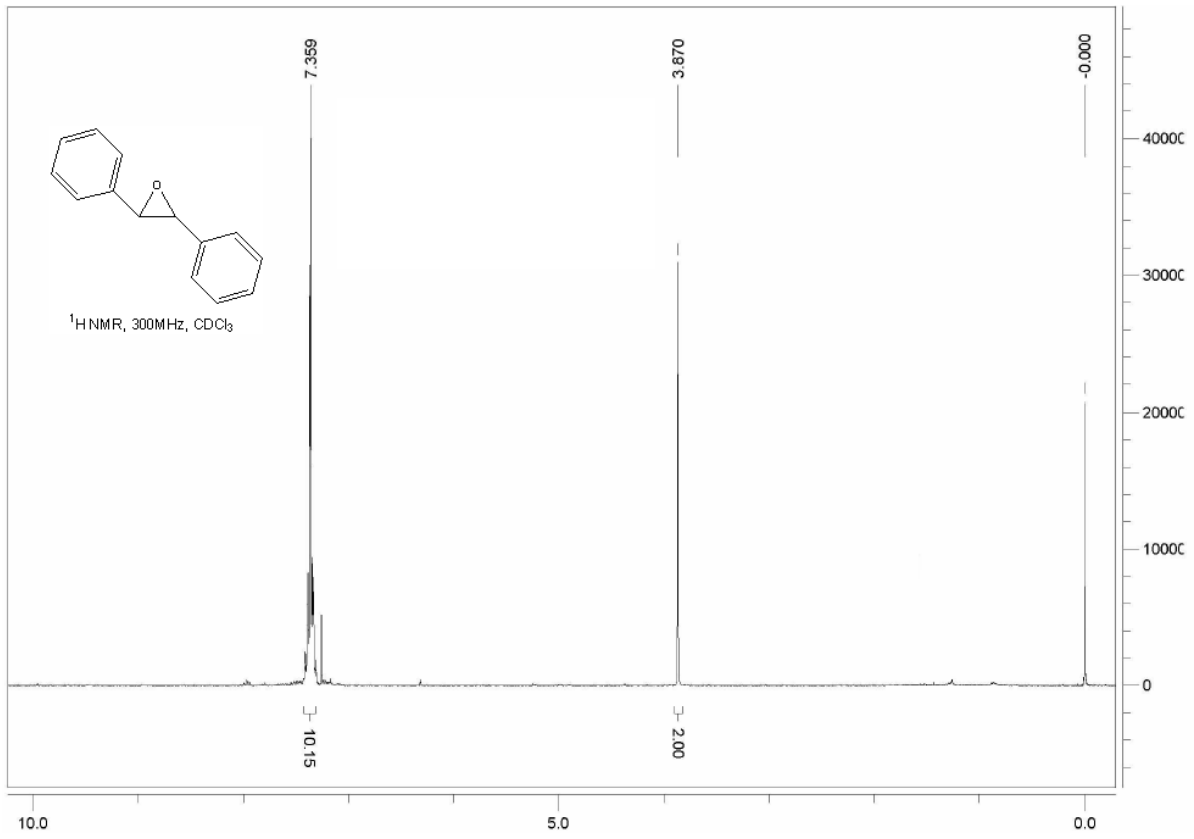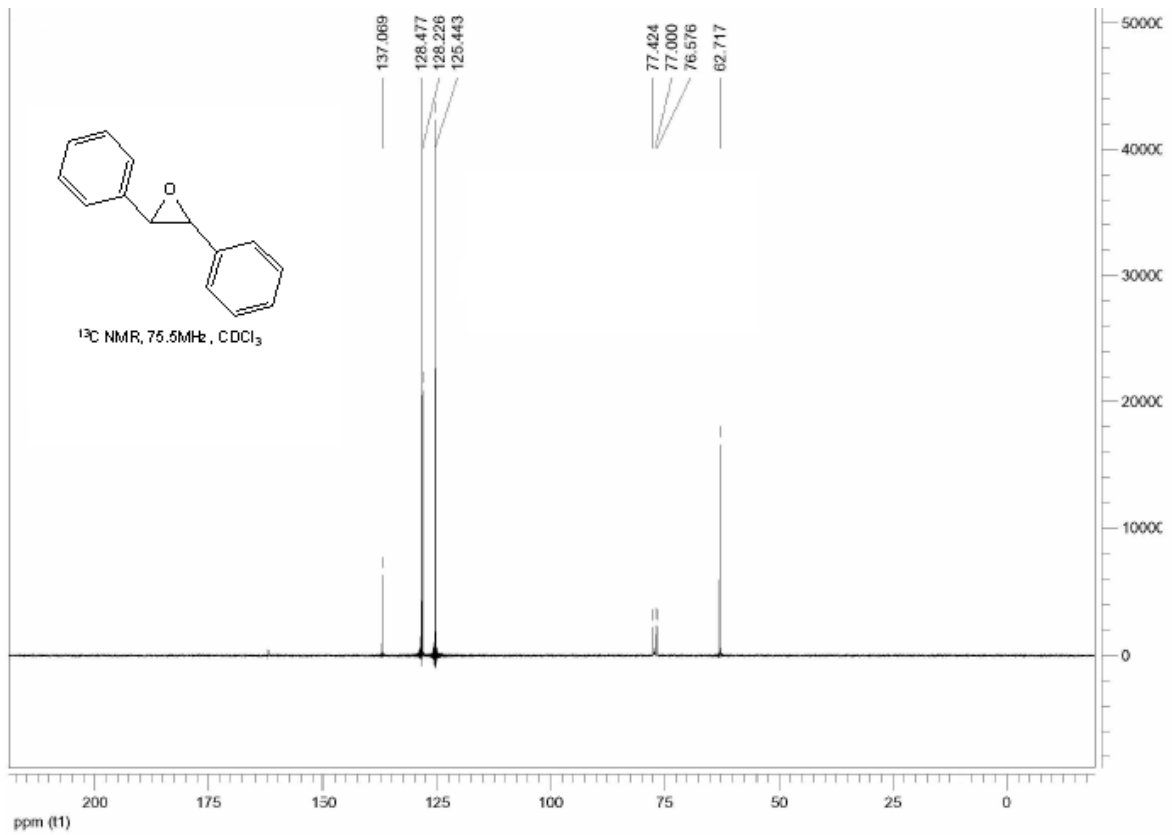

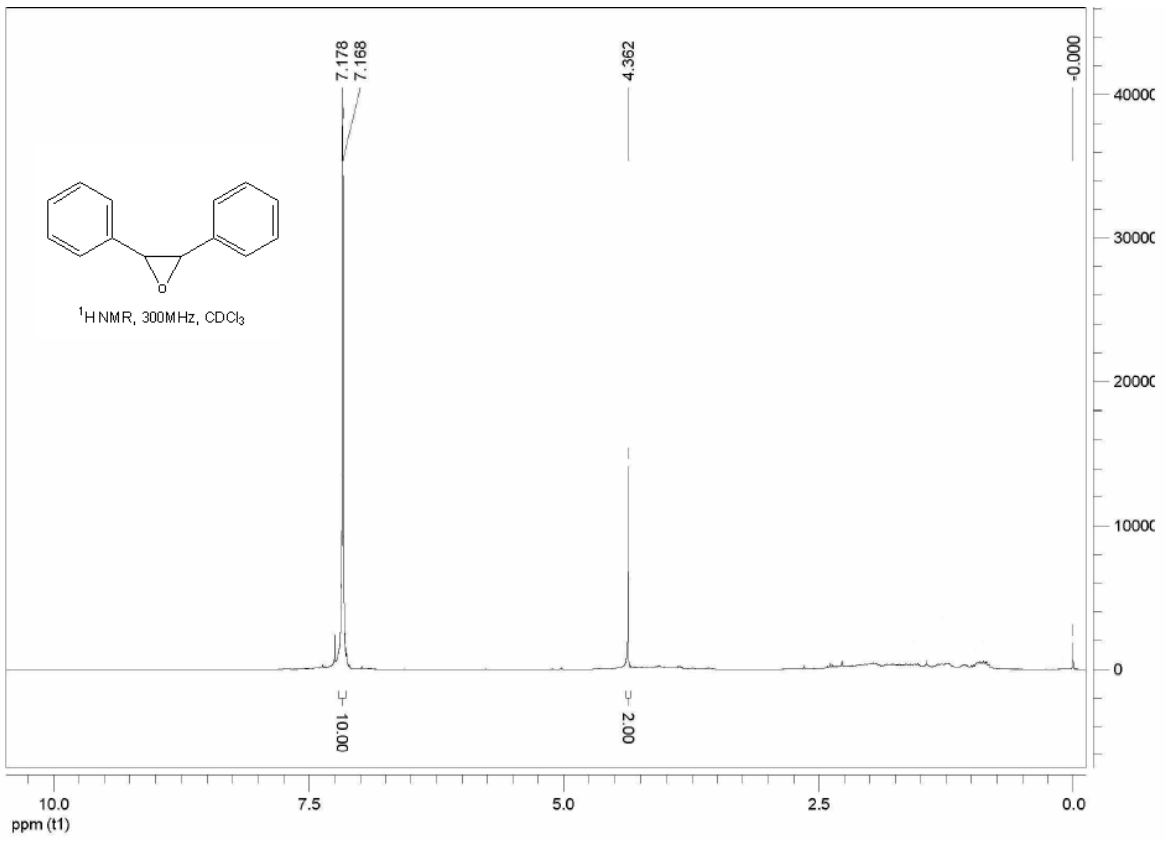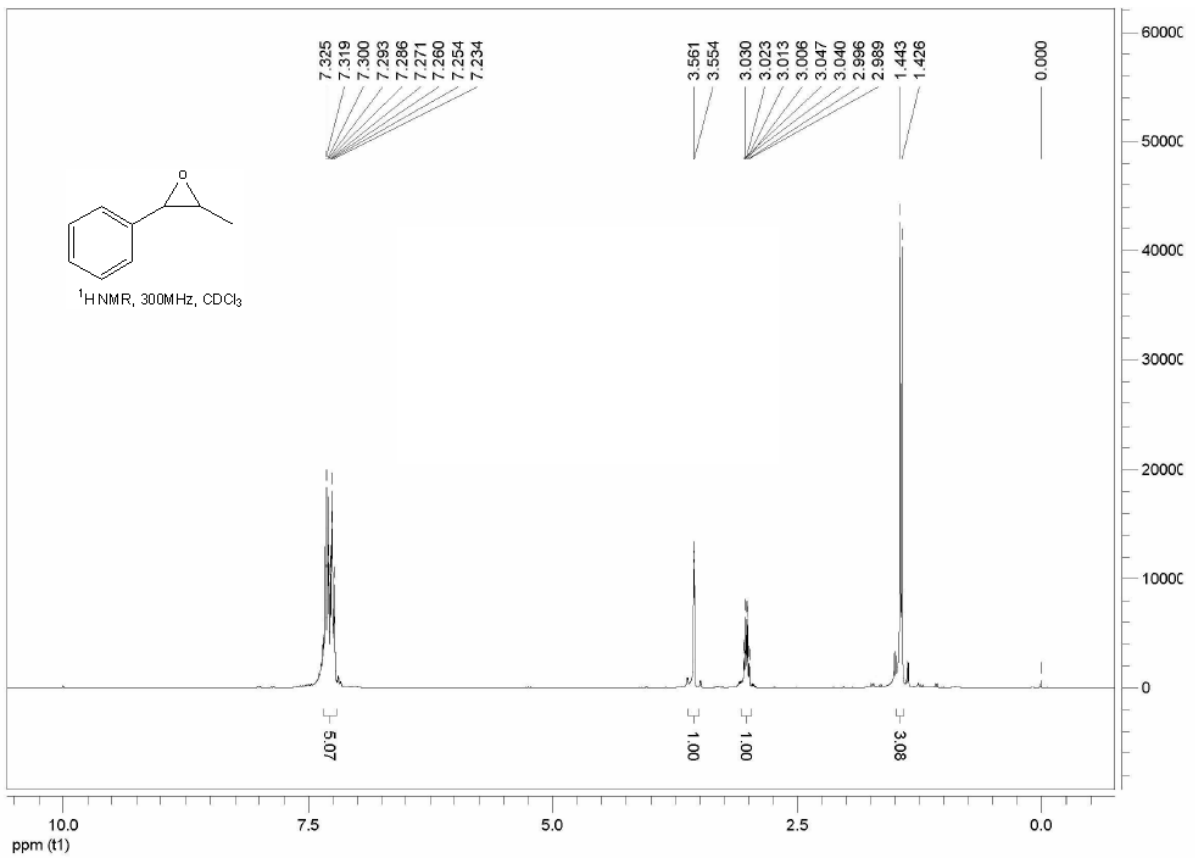

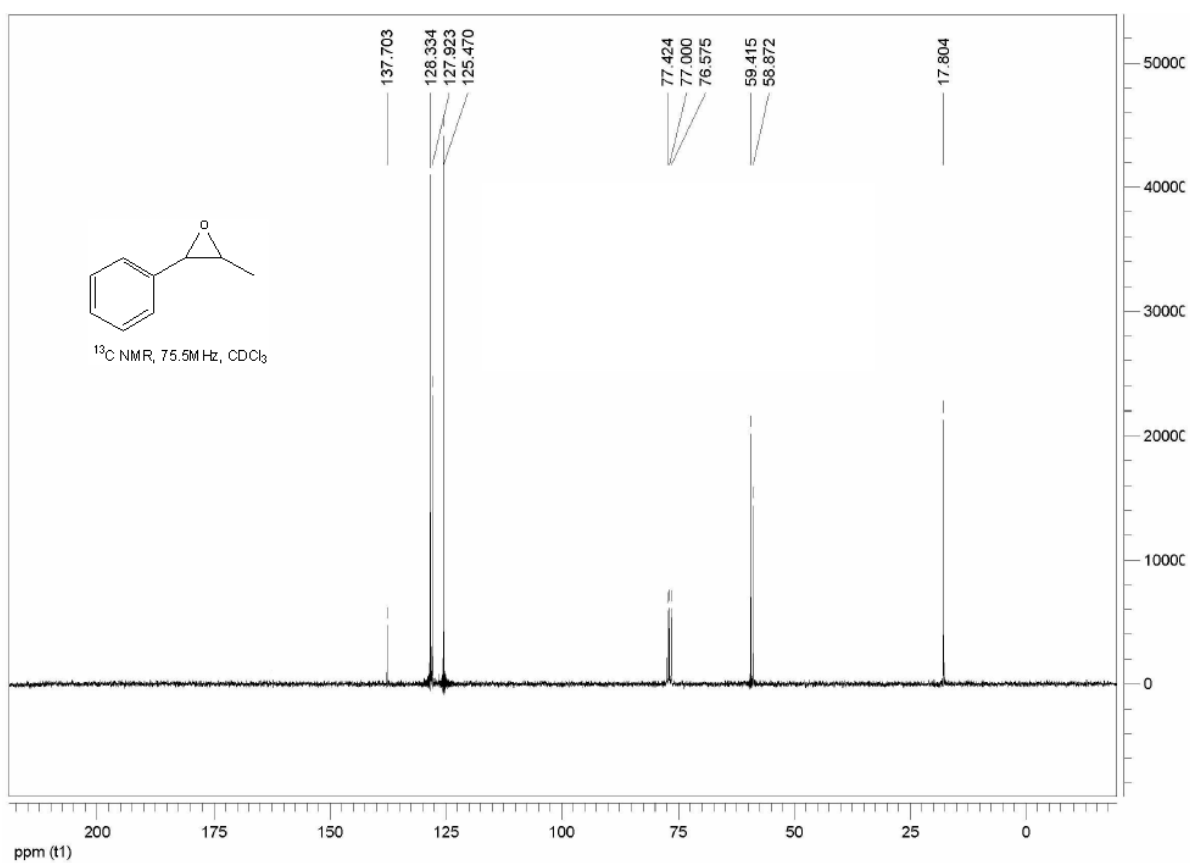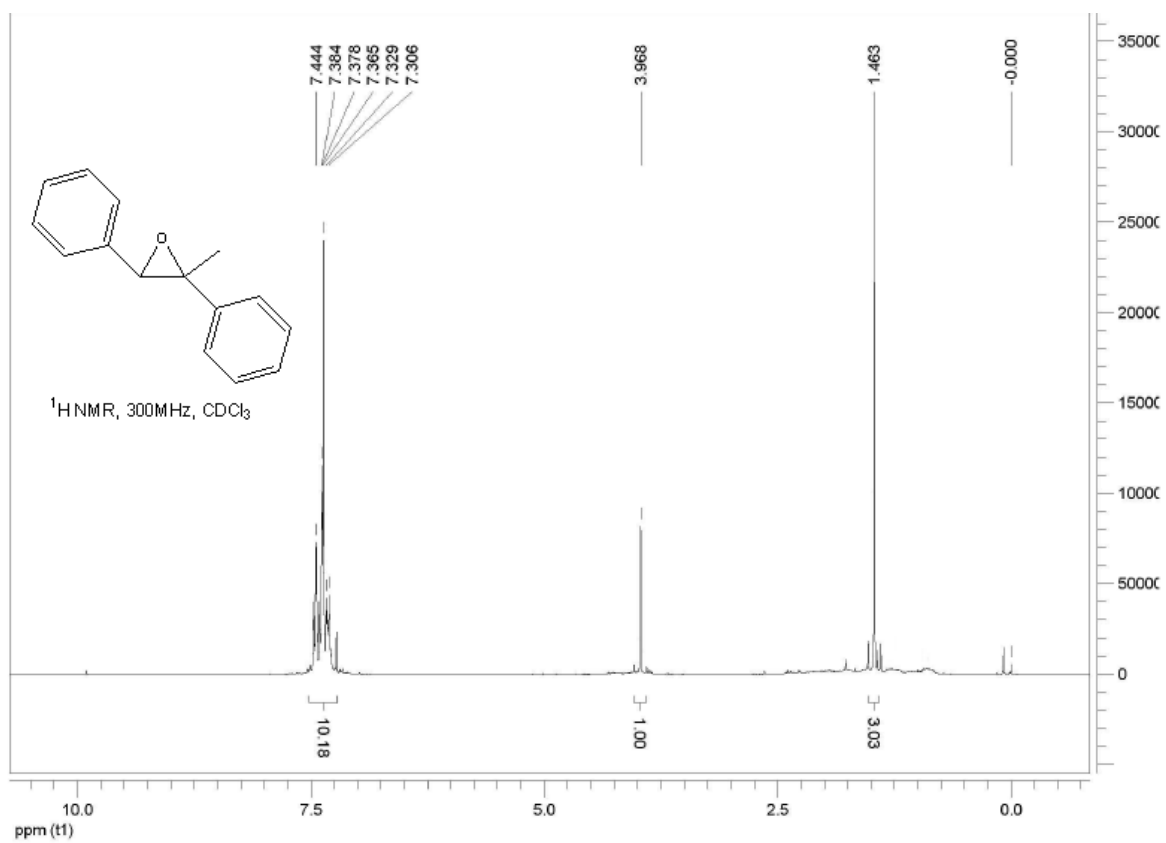



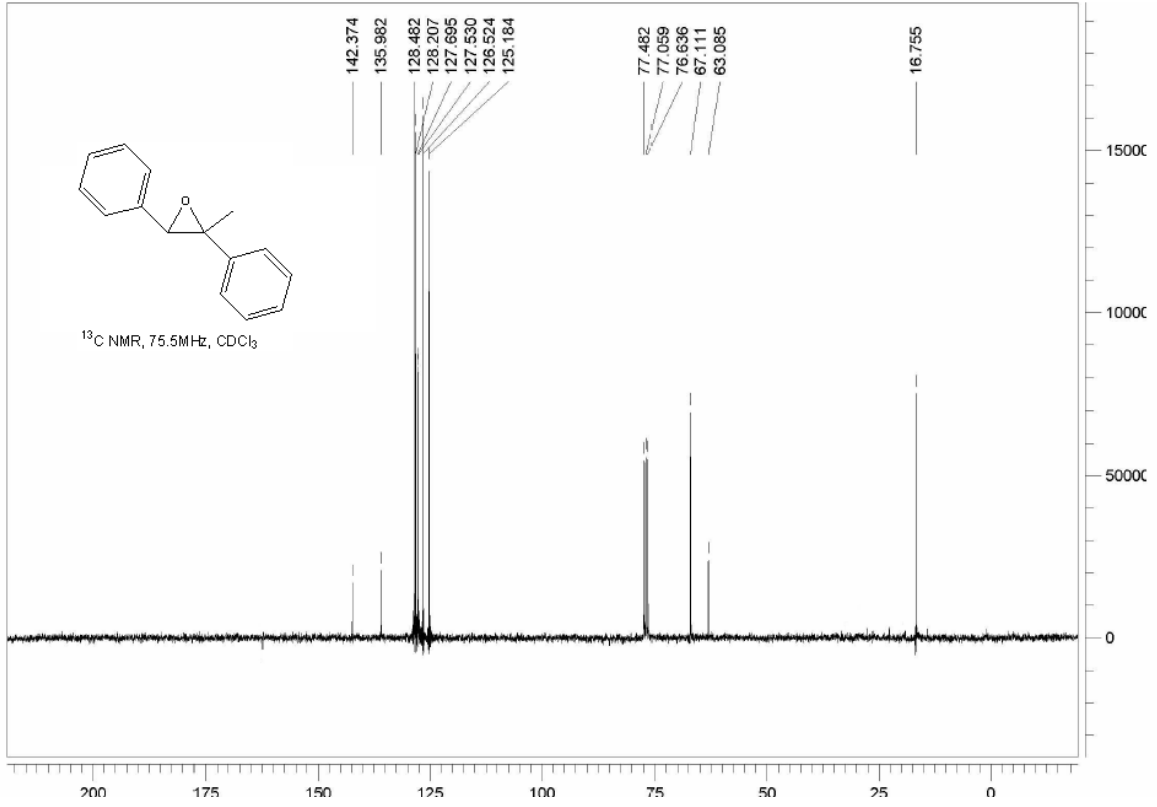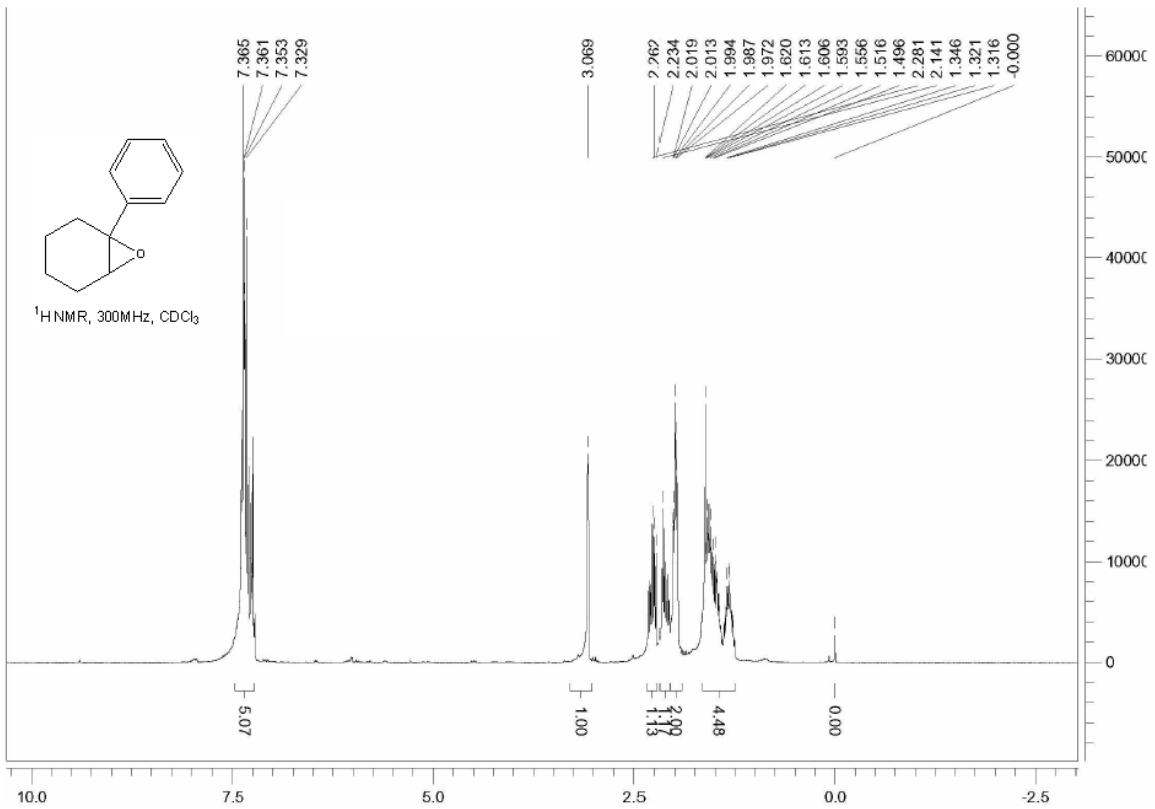

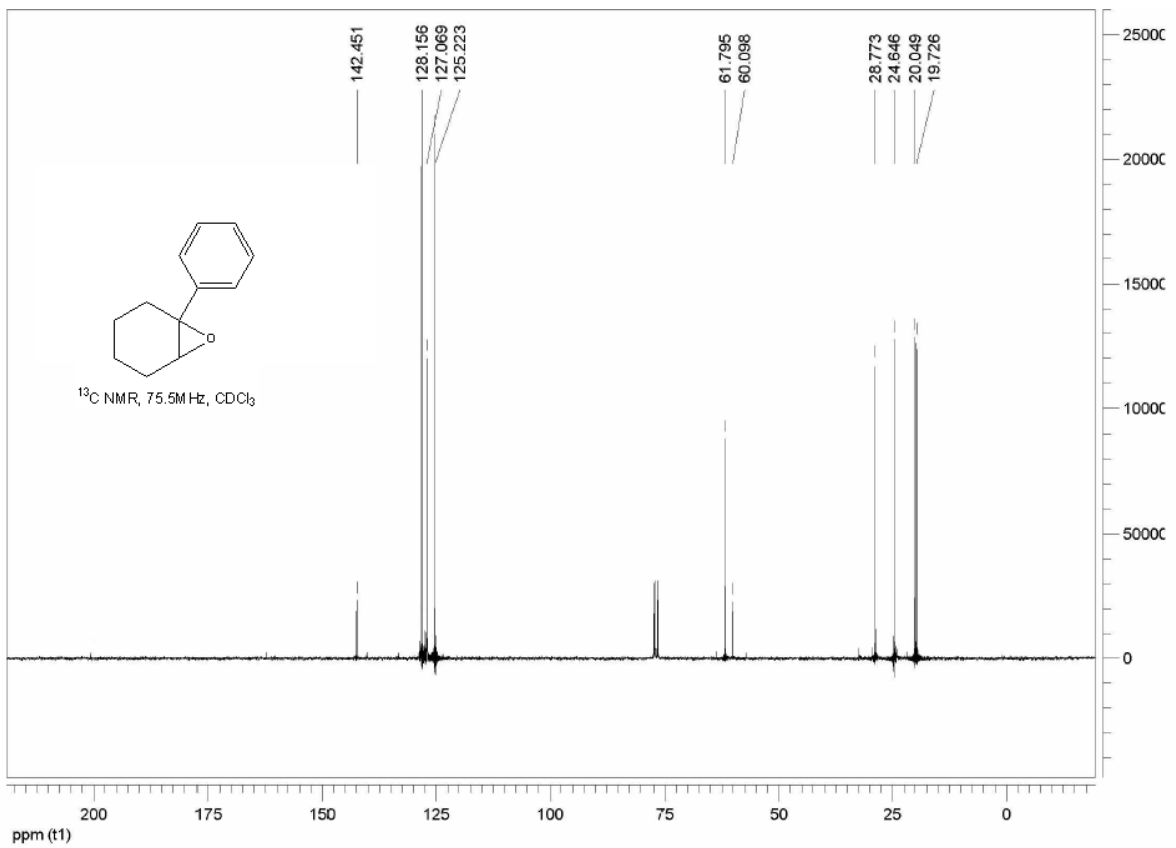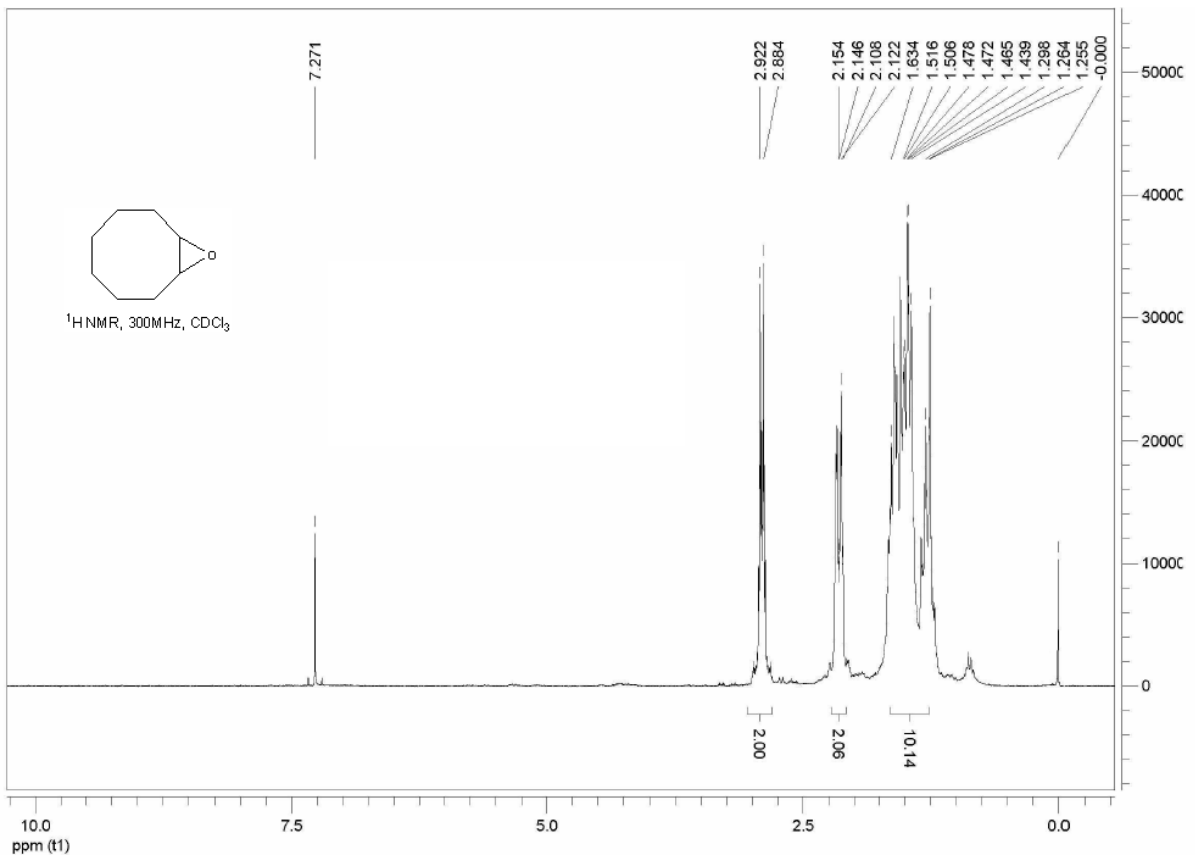

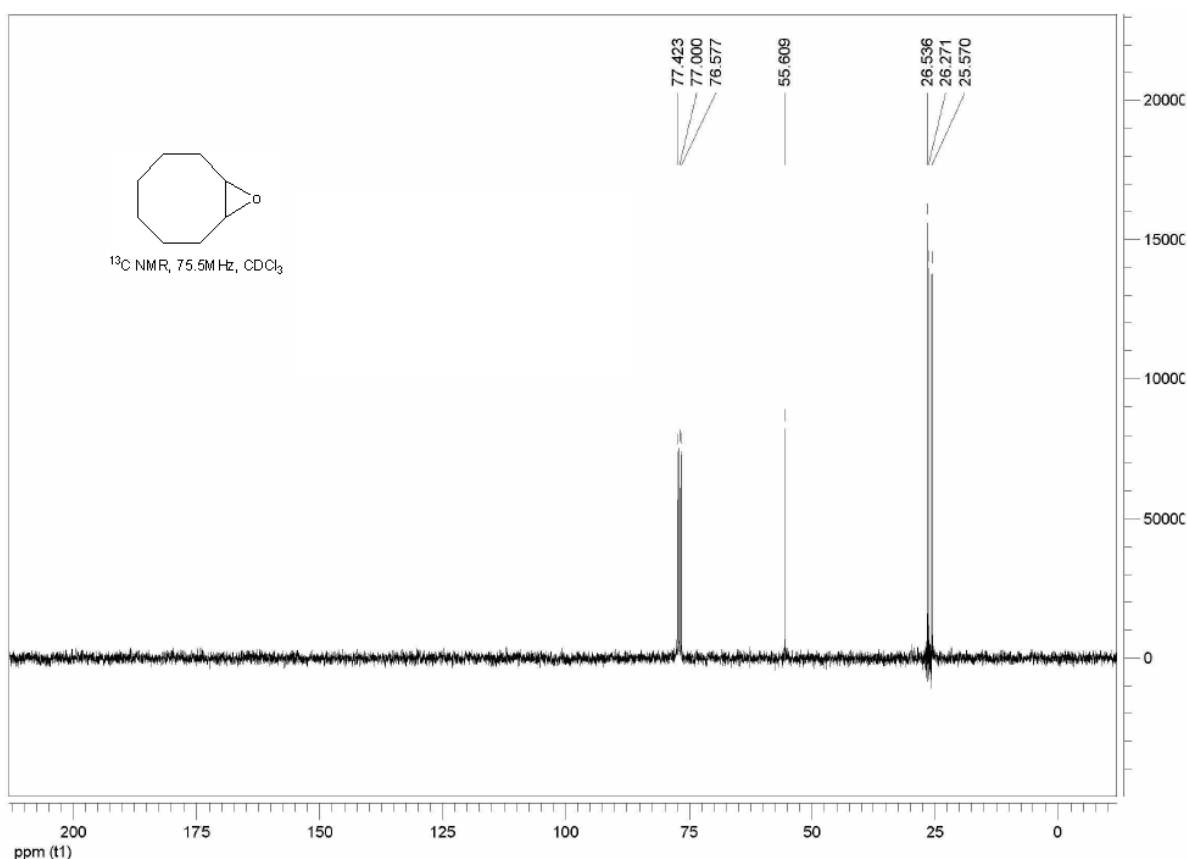

## 5. Characterization data for terpene epoxides

**1-methyl-7-oxabicyclo[4.1.0]heptane:**  $^1\text{H}$  NMR  $\delta$  1.28 (s, 3H), .62 (d,  $J = 9.6$  Hz, 1H), 1.43–1.60 (m, 4H), 1.66–1.70 (m, 4H), 2.86 (t, 1H);  $^{13}\text{C}$  NMR  $\delta$  17.2, 23.6, 24.0, 26.7, 27.6, 65.3, 66.4.

**3,8,8-trimethyl-4-oxatricyclo[5.1.0.0<sup>3,5</sup>]octane:**  $^1\text{H}$  NMR  $\delta$  0.99 (s, 3H), 1.30 (s, 6H), 1.41 (m, 1H), 1.62–1.66 (m, 2H), 2.87 (d,  $J = 3.2$  Hz, 1H);  $^{13}\text{C}$  NMR  $\delta$  18.6, 20.1, 21.7, 23.2, 23.6, 30.7, 38.1, 60.1, 61.5.

**2,7,7-trimethyl-3-oxatricyclo[4.1.1.0<sup>2,4</sup>]octane:**  $^1\text{H}$  NMR  $\delta$  1.01 (s, 6H), 1.27 (s, 3H), 1.40 (dd,  $J = 16.5, 2.3$  Hz, 1H), 1.47 (dd, 2H), 1.63 (dt,  $J = 16.5, 2.3$  Hz, 2H), 1.73 (dd,  $J = 16.5, 9.2$  Hz, 1H), 2.90 (t, 1H);  $^{13}\text{C}$  NMR  $\delta$  22.0, 24.5, 25.6, 27.8, 39.9, 41.8, 45.4, 59.1, 63.6.

**2-(6-methyl-7-oxabicyclo[4.1.0]heptan-3-yl)propan-2-ol:**  $^1\text{H}$  NMR  $\delta$  1.23 (s, 3H), 1.30 (s, 3H), 1.49 (m, 1H), 1.54 (t, 2H), 1.63–1.66 (m, 2H), 3.00 (d,  $J = 5.5$  Hz, 1H);  $^{13}\text{C}$  NMR  $\delta$  16.9, 22.8, 25.9, 27.8, 27.8, 29.5, 44.1, 58.5, 58.7, 72.2.

**1-methyl-4-(prop-1-en-2-yl)-7-oxabicyclo[4.1.0]heptane:**  $^1\text{H}$  NMR  $\delta$  1.13–2.27 (m, 7H), 1.29 (s, 3H), 1.71 (s, 3H), 3.02 (t, 1H,  $J = 5.5$  Hz), 4.75 (s, 2H);  $^{13}\text{C}$  NMR  $\delta$  20.2, 22.1, 25.8, 28.5, 30.7, 40.7, 57.3, 59.2, 109.0, 148.8.

## 6. References

1. C. J. Pouchert, J. Behnke, *The Aldrich Library of  $^{13}\text{C}$  and  $^1\text{H}$  FT NMR Spectra*, 1st ed., Vol. 1; Aldrich Chemical: Milwaukee, 1993, 377C.
2. (a) M. A. Baig, D. V. Banthorpe, G. Carr and D. Whittaker, *J. Chem. Soc., Perkin Trans. 2* 1989, 1981. (b) P. L. Robinson, C. N. Barry, J. W. Kelly and S. A. Evans, *J. Am. Chem. Soc.* 1985, **107**, 5210.
3. E. Kolehmainen, K. Laihia, M. Heinänen, K. Rissanen, R. Fröhlich, J. Korvola, P. Mänttari, and R. Kauppinen, *J. Chem. Soc., Perkin Trans.* 1993, **2**, 641. (b) J. Rodriguez and J.-P. Dulcere, *J. Org. Chem.* 1991, **56**, 469.
4. H. L. Kopperman, R. C. Hallcher, A. Riehl, R. M. Carlson and R. Caple, *Tetrahedron* 1976, **32**, 1621.
5. (a) Y. Morizawa, A. Kanakura, H. Yamamoto, T. Hiyama and H. Nozaki, *Bull. Chem. Soc. Jpn.* 1984, **57**, 1935. (b) A. Steinreiber, S. F. Mayer and K. Faber, *Synthesis*, 2001, 2035.
6. C. J. Pouchert and J. Behnke, *The Aldrich Library of  $^{13}\text{C}$  and  $^1\text{H}$  FT NMR Spectra*, 1st ed., Vol. 1; Aldrich Chemical: Milwaukee, 1993, 379A.
7. C. J. Pouchert and J. Behnke, *The Aldrich Library of  $^{13}\text{C}$  and  $^1\text{H}$  FT NMR Spectra*, 1st ed., Vol. 1; Aldrich Chemical: Milwaukee, 1993, 380A.
